# Supplementary material
Source: PubMed Central journal article supplement (PMC4108155)
Supplement: NIHMS571801-supplement-supplement_1.pdf [file NIHMS571801-supplement-supplement_1.pdf]

1  
2  
3 **Supplemental Files**  
4

5  
6 **Supplemental File 1.**  
7

8 Table of country-specific allele frequencies and association results.  
9  
10

11  
12  
13 **Supplemental File 2.**  
14

15 Consortia list of GEO-PD member sites.  
16  
17

18  
19  
20 **Supplemental File 3.**  
21

22 GEO-PD member site acknowledgements.  
23  
24  
25  
26  
27  
28  
29  
30  
31  
32  
33  
34  
35  
36  
37  
38  
39  
40  
41  
42  
43  
44  
45  
46  
47  
48  
49  
50  
51  
52  
53  
54  
55  
56  
57  
58  
59  
60

Figure 1. Population-specific allele frequencies

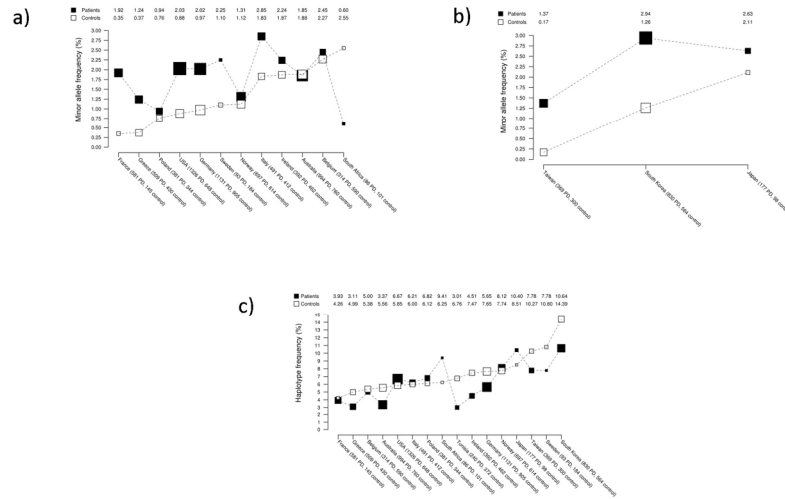

215x166mm (300 x 300 DPI)

**Supplemental Table 1a: Country-specific minor allele frequencies and results of association analysis for p.M1646T in Caucasians**

| Country      | Sample size      |          | Minor allele frequency (95% CI), % |                    | Test of association <sup>a</sup> |         |
|--------------|------------------|----------|------------------------------------|--------------------|----------------------------------|---------|
|              | Patients with PD | Controls | Patients with PD                   | Controls           | OR (95% CI)                      | P-value |
| France       | 581              | 145      | 1.92 (1.19 - 2.92)                 | 0.35 (0.01 - 1.93) | 5.68 (0.76 – 42.58)              | 0.091   |
| Greece       | 509              | 430      | 1.24 (0.64 - 2.16)                 | 0.37 (0.08 - 1.08) | 2.50 (0.69 – 9.11)               | 0.16    |
| Poland       | 381              | 344      | 0.94 (0.38 - 1.93)                 | 0.76 (0.25 - 1.76) | 1.25 (0.39 – 3.98)               | 0.71    |
| USA          | 1326             | 648      | 2.03 (1.52 - 2.65)                 | 0.88 (0.44 - 1.57) | 2.06 (1.04 – 4.07)               | 0.038   |
| Germany      | 1131             | 905      | 2.02 (1.47 - 2.70)                 | 0.97 (0.57 - 1.55) | 2.13 (1.20 – 3.78)               | 0.009   |
| Sweden       | 93               | 184      | 2.25 (0.62 - 5.65)                 | 1.10 (0.30 - 2.79) | 2.09 (0.51 – 8.58)               | 0.30    |
| Norway       | 697              | 614      | 1.31 (0.76 - 2.09)                 | 1.12 (0.60 - 1.92) | 1.17 (0.56 – 2.42)               | 0.68    |
| Italy        | 491              | 412      | 2.85 (1.89 - 4.12)                 | 1.83 (1.03 – 3.00) | 1.43 (0.74 – 2.76)               | 0.28    |
| Ireland      | 392              | 462      | 2.24 (1.31 - 3.57)                 | 1.87 (1.09 - 2.98) | 1.21 (0.61 – 2.40)               | 0.59    |
| Australia    | 994              | 760      | 1.85 (1.30 - 2.55)                 | 1.88 (1.25 - 2.70) | 0.98 (0.60 – 1.63)               | 0.95    |
| Belgium      | 314              | 590      | 2.45 (1.38 - 4.01)                 | 2.27 (1.30 - 3.66) | 1.08 (0.53 – 2.23)               | 0.83    |
| South Africa | 86               | 101      | 0.60 (0.02 - 3.31)                 | 2.55 (0.83 - 5.85) | 0.23 (0.03 – 1.98)               | 0.18    |
| Overall      | 6995             | 5595     | 1.88 (1.66 - 2.12)                 | 1.30 (1.09 - 1.54) | 1.43 (1.15 – 1.78)               | 0.0012  |

OR=odds ratio. CI=confidence interval. PD=Parkinson's disease. <sup>a</sup>ORs, 95% CIs, and p-values result from fixed effects logistic regression models with adjustment for GEO-PD site for countries with more than one site and in the overall model; country-specific ORs and 95% CIs, but not country-specific p-values, were reported in our initial study<sup>4</sup>.

**Supplemental Table 1b: Country-specific minor allele frequencies and results of association analysis for p.A419V in Asians**

| Country     | Sample size      |          | Minor allele frequency (95% CI), % |                    | Test of association <sup>a</sup> |        |
|-------------|------------------|----------|------------------------------------|--------------------|----------------------------------|--------|
|             | Patients with PD | Controls | Patients with PD                   | Controls           | OR (95% CI)                      |        |
| Taiwan      | 369              | 300      | 1.37 (0.66 - 2.50)                 | 0.17 (0.00 - 0.93) | 7.51 (0.95 – 59.60)              | 0.057  |
| South Korea | 830              | 564      | 2.94 (2.18 - 3.88)                 | 1.26 (0.69 - 2.11) | 2.21 (1.20 – 4.06)               | 0.011  |
| Japan       | 177              | 98       | 2.63 (1.21 - 4.94)                 | 2.11 (0.58 - 5.30) | 1.26 (0.38 – 4.22)               | 0.70   |
| Overall     | 1376             | 962      | 2.48 (1.93 - 3.14)                 | 1.00 (0.61 - 1.56) | 1.73 (1.20 – 2.49)               | 0.0011 |

OR=odds ratio. CI=confidence interval. PD=Parkinson's disease. <sup>a</sup>ORs, 95% CIs, and p-values result from fixed effects logistic regression models with adjustment for GEO-PD site for countries with more than one site and in the overall model; country-specific ORs and 95% CIs, but not country-specific p-values, were reported in our initial study<sup>4</sup>.

**Supplemental Table 1c: Country-specific frequency and results of association analysis for the p.N551K-R1398H-K1423K haplotype**

| Country      | Sample size      |          | Haplotype frequency (95% CI), % |                       | Test of association <sup>a</sup> |         |
|--------------|------------------|----------|---------------------------------|-----------------------|----------------------------------|---------|
|              | Patients with PD | Controls | Patients with PD                | Controls              | OR (95% CI)                      | P-value |
| France       | 581              | 145      | 3.93 (2.48 – 5.89)              | 4.26 (1.58 – 9.03)    | 0.92 (0.37 – 2.31)               | 0.86    |
| Greece       | 509              | 430      | 3.11 (1.75 – 5.07)              | 4.99 (2.68 – 7.00)    | 0.70 (0.35 – 1.42)               | 0.33    |
| Belgium      | 314              | 590      | 5.00 (2.83 – 8.11)              | 5.38 (3.57 – 7.73)    | 0.93 (0.48 – 1.77)               | 0.82    |
| Australia    | 994              | 760      | 3.37 (2.32 – 4.72)              | 5.56 (4.02 – 7.47)    | 0.59 (0.37 – 0.95)               | 0.030   |
| USA          | 1326             | 648      | 6.67 (5.34 – 8.21)              | 5.85 (4.16 – 7.98)    | 1.16 (0.76 – 1.77)               | 0.48    |
| Italy        | 491              | 412      | 6.21 (4.20 – 8.80)              | 6.00 (3.88 – 8.80)    | 1.03 (0.59 – 1.80)               | 0.92    |
| Poland       | 381              | 344      | 6.82 (4.51 – 9.84)              | 6.12 (3.83 – 9.21)    | 1.12 (0.62 – 2.04)               | 0.70    |
| South Africa | 86               | 101      | 9.41 (4.15 – 17.71)             | 6.25 (2.33 – 13.11)   | 1.56 (0.52 – 4.69)               | 0.43    |
| Tunisia      | 240              | 372      | 3.01 (0.99 – 6.89)              | 6.76 (4.38 – 9.89)    | 0.42 (0.16 – 1.14)               | 0.091   |
| Ireland      | 392              | 462      | 4.51 (2.65 – 7.12)              | 7.47 (5.23 – 10.29)   | 0.58 (0.32 – 1.06)               | 0.079   |
| Germany      | 1131             | 905      | 5.65 (4.36 – 7.19)              | 7.65 (5.96 – 9.63)    | 0.71 (0.50 – 1.02)               | 0.064   |
| Norway       | 697              | 614      | 8.12 (6.18 – 10.44)             | 7.74 (5.73 – 10.19)   | 1.05 (0.70 – 1.58)               | 0.80    |
| Japan        | 177              | 98       | 10.40 (6.28 – 15.94)            | 8.51 (3.75 – 16.08)   | 1.25 (0.52 – 2.99)               | 0.62    |
| Taiwan       | 369              | 300      | 7.78 (5.23 – 11.04)             | 10.27 (7.04 – 14.34)  | 0.74 (0.43 – 1.26)               | 0.27    |
| Sweden       | 93               | 184      | 7.78 (3.18 – 15.37)             | 10.80 (6.63 – 16.34)  | 0.70 (0.28 – 1.73)               | 0.44    |
| South Korea  | 830              | 564      | 10.64 (8.60 – 12.98)            | 14.39 (11.54 – 17.63) | 0.72 (0.52 – 1.00)               | 0.048   |
| Overall      | 8611             | 6929     | 6.18 (5.67 – 6.72)              | 7.90 (7.24 – 8.60)    | 0.82 (0.72 – 0.94)               | 0.0043  |

OR=odds ratio. CI=confidence interval. PD=Parkinson's disease. <sup>a</sup>ORs, 95% CIs, and p-values result from fixed effects logistic regression models with adjustment for GEO-PD site for countries with more than one site and in the overall model; country-specific ORs and 95% CIs, but not country-specific p-values, were reported in our initial study<sup>4</sup>.
